# Supplementary material for: A novel electric stimulus-responsive micro-actuator for powerful biomimetic motions
Source: Royal Society of Chemistry journal article supplement (doi:10.1039/d3nr01866k), 2023-01-01
Supplement: d3nr01866k1.zip [file d3nr01866k1.zip]

## Sheet: 电流测试
Time (s)	Value (A)
0	-0.0166696
2e-05	-0.0147886
4e-05	-0.0213721
6e-05	-0.0298365
8e-05	-0.00444325
0.0001	-0.0307769
0.00012	-0.023253
0.00014	-0.00914569
0.00016	-0.023253
0.00018	-0.0166696
0.0002	-0.0241935
0.00022	-0.0176101
0.00024	-0.0204316
0.00026	-0.027015
0.00028	-0.0157291
0.0003	-0.0166696
0.00032	-0.0138481
0.00034	-0.0166696
0.00036	-0.0204316
0.00038	-0.0157291
0.0004	-0.0223125
0.00042	-0.000681288
0.00044	-0.0194911
0.00046	-0.0166696
0.00048	-0.0147886
0.0005	-0.0082052
0.00052	-0.0241935
0.00054	-0.0326579
0.00056	-0.00726471
0.00058	-0.025134
0.0006	-0.0082052
0.00062	-0.023253
0.00064	-0.0307769
0.00066	-0.0100862
0.00068	-0.0119672
0.0007	-0.0241935
0.00072	-0.0307769
0.00074	0.00119969
0.00076	-0.0279555
0.00078	-0.00914569
0.0008	-0.0307769
0.00082	-0.0345389
0.00084	-0.0213721
0.00086	-0.0147886
0.00088	-0.0307769
0.0009	-0.0326579
0.00092	-0.0298365
0.00094	-0.0307769
0.00096	-0.0110267
0.00098	-0.0326579
0.001	-0.0147886
0.00102	-0.0119672
0.00104	-0.023253
0.00106	-0.0260745
0.00108	-0.027015
0.0011	-0.0335984
0.00112	-0.00726471
0.00114	-0.0298365
0.00116	-0.0335984
0.00118	-0.0260745
0.0012	-0.0157291
0.00122	-0.0100862
0.00124	-0.0354794
0.00126	-0.0401818
0.00128	-0.00632422
0.0013	-0.0176101
0.00132	-0.0477058
0.00134	-0.0147886
0.00136	-0.0213721
0.00138	-0.0138481
0.0014	-0.0458248
0.00142	-0.0129076
0.00144	-0.0401818
0.00146	-0.0373604
0.00148	-0.025134
0.0015	-0.0194911
0.00152	-0.0213721
0.00154	-0.0335984
0.00156	-0.025134
0.00158	-0.0383009
0.0016	-0.0335984
0.00162	-0.0260745
0.00164	-0.023253
0.00166	-0.00914569
0.00168	-0.0392414
0.0017	-0.0345389
0.00172	-0.023253
0.00174	-0.0194911
0.00176	-0.0223125
0.00178	-0.0298365
0.0018	-0.0392414
0.00182	-0.025134
0.00184	-0.0279555
0.00186	-0.0401818
0.00188	-0.0129076
0.0019	-0.0223125
0.00192	-0.0260745
0.00194	-0.027015
0.00196	-0.0204316
0.00198	-0.0119672
0.002	-0.0345389
0.00202	-0.0326579
0.00204	-0.0317174
0.00206	-0.0204316
0.00208	-0.0279555
0.0021	-0.0298365
0.00212	-0.0194911
0.00214	-0.0223125
0.00216	-0.0354794
0.00218	-0.0364199
0.0022	-0.027015
0.00222	-0.0383009
0.00224	-0.025134
0.00226	-0.0204316
0.00228	-0.0194911
0.0023	-0.0401818
0.00232	-0.0298365
0.00234	-0.0166696
0.00236	-0.0298365
0.00238	-0.023253
0.0024	-0.0213721
0.00242	-0.0157291
0.00244	-0.0138481
0.00246	-0.0110267
0.00248	-0.0354794
0.0025	-0.00256227
0.00252	-0.0082052
0.00254	-0.0298365
0.00256	-0.0420628
0.00258	-0.0129076
0.0026	-0.0223125
0.00262	-0.0147886
0.00264	-0.0176101
0.00266	-0.00632422
0.00268	-0.0082052
0.0027	-0.0213721
0.00272	-0.025134
0.00274	-0.0241935
0.00276	-0.027015
0.00278	-0.0279555
0.0028	-0.0082052
0.00282	-0.0176101
0.00284	-0.0100862
0.00286	-0.0317174
0.00288	-0.0147886
0.0029	-0.0176101
0.00292	-0.0213721
0.00294	-0.0335984
0.00296	0.268299
0.00298	0.696222
0.003	0.988714
0.00302	1.22854
0.00304	1.37149
0.00306	1.47119
0.00308	1.51163
0.0031	1.53232
0.00312	1.51163
0.00314	1.49752
0.00316	1.47119
0.00318	1.4251
0.0032	1.35927
0.00322	1.28685
0.00324	1.21725
0.00326	1.13637
0.00328	1.08464
0.0033	1.02351
0.00332	0.96144
0.00334	0.871153
0.00336	0.818485
0.00338	0.756413
0.0034	0.684936
0.00342	0.657662
0.00344	0.609697
0.00346	0.556089
0.00348	0.529755
0.0035	0.484611
0.00352	0.445111
0.00354	0.397146
0.00356	0.362348
0.00358	0.343538
0.0036	0.316264
0.00362	0.280525
0.00364	0.247608
0.00366	0.246667
0.00368	0.217512
0.0037	0.201524
0.00372	0.181774
0.00374	0.164845
0.00376	0.151678
0.00378	0.134749
0.0038	0.121582
0.00382	0.118761
0.00384	0.0999511
0.00386	0.0905462
0.00388	0.0877247
0.0039	0.0773793
0.00392	0.065153
0.00394	0.0566886
0.00396	0.0519861
0.00398	0.0519861
0.004	0.0397598
0.00402	0.0388193
0.00404	0.0359978
0.00406	0.0331763
0.00408	0.0275334
0.0041	0.0162475
0.00412	0.0181285
0.00414	0.0228309
0.00416	0.00778312
0.00418	0.0181285
0.0042	0.00119969
0.00422	0.00590214
0.00424	-0.00256227
0.00426	0.00308067
0.00428	-0.00538373
0.0043	-0.0082052
0.00432	-0.00256227
0.00434	-0.00350276
0.00436	-0.00444325
0.00438	-0.0241935
0.0044	-0.00726471
0.00442	-0.00914569
0.00444	-0.0082052
0.00446	-0.0157291
0.00448	-0.00726471
0.0045	-0.0157291
0.00452	-0.0129076
0.00454	-0.0157291
0.00456	-0.0110267
0.00458	-0.0194911
0.0046	-0.0147886
0.00462	-0.0082052
0.00464	-0.0110267
0.00466	-0.0185506
0.00468	-0.0166696
0.0047	-0.0176101
0.00472	-0.0110267
0.00474	-0.0147886
0.00476	-0.0166696
0.00478	-0.0147886
0.0048	-0.0166696
0.00482	-0.0129076
0.00484	-0.0157291
0.00486	-0.0194911
0.00488	-0.0119672
0.0049	-0.00726471
0.00492	-0.0166696
0.00494	-0.0138481
0.00496	-0.0194911
0.00498	-0.0119672
0.005	-0.0138481
0.00502	-0.0157291
0.00504	-0.0100862
0.00506	-0.0176101
0.00508	-0.0166696
0.0051	-0.0176101
0.00512	-0.0176101
0.00514	-0.0260745
0.00516	-0.0110267
0.00518	-0.0147886
0.0052	-0.0157291
0.00522	-0.0176101
0.00524	-0.025134
0.00526	-0.0147886
0.00528	-0.0157291
0.0053	-0.0204316
0.00532	-0.0147886
0.00534	-0.0185506
0.00536	-0.0147886
0.00538	-0.0157291
0.0054	-0.0213721
0.00542	-0.0138481
0.00544	-0.0176101
0.00546	-0.0157291
0.00548	-0.0147886
0.0055	-0.0185506
0.00552	-0.0147886
0.00554	-0.0100862
0.00556	-0.00538373
0.00558	-0.0147886
0.0056	-0.0147886
0.00562	-0.0100862
0.00564	-0.0138481
0.00566	-0.0166696
0.00568	-0.0147886
0.0057	-0.0241935
0.00572	-0.0082052
0.00574	-0.0082052
0.00576	-0.00726471
0.00578	-0.0129076
0.0058	-0.0119672
0.00582	-0.00726471
0.00584	-0.0082052
0.00586	-0.0129076
0.00588	-0.0100862
0.0059	0.00119969
0.00592	-0.00538373
0.00594	-0.00538373
0.00596	-0.0157291
0.00598	-0.00726471
0.006	-0.0138481
0.00602	-0.00162178
0.00604	-0.0100862
0.00606	-0.0082052
0.00608	-0.00914569
0.0061	-0.00538373
0.00612	-0.0119672
0.00614	-0.0129076
0.00616	-0.0119672
0.00618	-0.0129076
0.0062	-0.0100862
0.00622	-0.0157291
0.00624	0.0660935
0.00626	-0.027015
0.00628	-0.0185506
0.0063	-0.0176101
0.00632	-0.027015
0.00634	-0.0241935
0.00636	-0.027015
0.00638	-0.0204316
0.0064	-0.023253
0.00642	-0.0185506
0.00644	-0.0166696
0.00646	-0.0110267
0.00648	-0.0185506
0.0065	-0.0185506
0.00652	-0.0223125
0.00654	-0.0176101
0.00656	-0.0166696
0.00658	-0.0204316
0.0066	-0.0307769
0.00662	-0.0176101
0.00664	-0.0176101
0.00666	-0.0176101
0.00668	-0.0194911
0.0067	-0.0185506
0.00672	-0.0157291
0.00674	-0.0129076
0.00676	-0.0157291
0.00678	-0.0138481
0.0068	-0.0157291
0.00682	-0.0129076
0.00684	-0.0110267
0.00686	-0.0260745
0.00688	-0.0194911
0.0069	-0.0119672
0.00692	-0.0147886
0.00694	-0.00726471
0.00696	-0.0298365
0.00698	-0.0129076
0.007	-0.0129076
0.00702	-0.0147886
0.00704	-0.0082052
0.00706	-0.025134
0.00708	-0.0129076
0.0071	-0.0194911
0.00712	-0.0194911
0.00714	-0.0166696
0.00716	-0.0223125
0.00718	-0.0185506
0.0072	-0.0082052
0.00722	-0.0204316
0.00724	-0.0100862
0.00726	-0.0194911
0.00728	-0.0110267
0.0073	-0.0147886
0.00732	-0.0147886
0.00734	-0.0138481
0.00736	-0.0166696
0.00738	-0.0129076
0.0074	-0.0176101
0.00742	-0.0204316
0.00744	-0.0119672
0.00746	-0.0204316
0.00748	-0.0138481
0.0075	-0.0129076
0.00752	-0.0176101
0.00754	-0.0129076
0.00756	-0.0157291
0.00758	-0.028896
0.0076	-0.0185506
0.00762	-0.00256227
0.00764	-0.0185506
0.00766	0.00119969
0.00768	-0.0204316
0.0077	0.000259201
0.00772	-0.0241935
0.00774	-0.0317174
0.00776	-0.0082052
0.00778	-0.00256227
0.0078	-0.0185506
0.00782	-0.0194911
0.00784	-0.025134
0.00786	-0.00726471
0.00788	-0.0326579
0.0079	-0.00914569
0.00792	-0.00632422
0.00794	-0.0157291
0.00796	-0.00538373
0.00798	-0.028896
0.008	-0.0110267
0.00802	-0.0166696
0.00804	-0.0129076
0.00806	-0.0194911
0.00808	-0.0223125
0.0081	-0.0147886
0.00812	-0.0213721
0.00814	0.00308067
0.00816	-0.027015
0.00818	-0.023253
0.0082	-0.0100862
0.00822	-0.0176101
0.00824	-0.0166696
0.00826	-0.0147886
0.00828	-0.0223125
0.0083	0.00214018
0.00832	-0.0185506
0.00834	-0.0241935
0.00836	-0.028896
0.00838	-0.0138481
0.0084	-0.0119672
0.00842	-0.0204316
0.00844	-0.0223125
0.00846	-0.0223125
0.00848	-0.0176101
0.0085	-0.0241935
0.00852	-0.0138481
0.00854	-0.0241935
0.00856	-0.0147886
0.00858	-0.00538373
0.0086	-0.027015
0.00862	-0.0166696
0.00864	-0.0100862
0.00866	-0.0129076
0.00868	-0.025134
0.0087	-0.025134
0.00872	-0.0129076
0.00874	-0.0157291
0.00876	-0.00538373
0.00878	-0.0298365
0.0088	-0.0100862
0.00882	-0.0082052
0.00884	-0.0241935
0.00886	-0.0129076
0.00888	-0.0194911
0.0089	-0.0176101
0.00892	-0.028896
0.00894	-0.0129076
0.00896	-0.00726471
0.00898	-0.0185506
0.009	-0.0138481
0.00902	-0.0129076
0.00904	-0.0223125
0.00906	-0.00538373
0.00908	-0.0204316
0.0091	-0.0110267
0.00912	-0.0166696
0.00914	-0.0194911
0.00916	-0.0110267
0.00918	-0.00444325
0.0092	-0.027015
0.00922	-0.0204316
0.00924	-0.00726471
0.00926	-0.0129076
0.00928	-0.0110267
0.0093	-0.0157291
0.00932	-0.000681288
0.00934	-0.0147886
0.00936	-0.0119672
0.00938	-0.0392414
0.0094	-0.00914569
0.00942	-0.0147886
0.00944	-0.0354794
0.00946	-0.000681288
0.00948	-0.027015
0.0095	-0.0138481
0.00952	-0.0138481
0.00954	-0.0157291
0.00956	-0.0185506
0.00958	-0.0100862
0.0096	-0.00538373
0.00962	-0.0129076
0.00964	-0.0326579
0.00966	0.00308067
0.00968	-0.0119672
0.0097	-0.0157291
0.00972	-0.0166696
0.00974	-0.0176101
0.00976	-0.00256227
0.00978	-0.0176101
0.0098	-0.0260745
0.00982	-0.0119672
0.00984	-0.0185506
0.00986	-0.0138481
0.00988	-0.0138481
0.0099	-0.0100862
0.00992	-0.0157291
0.00994	-0.00914569
0.00996	-0.0119672
0.00998	-0.00538373
0.01	-0.025134
0.01002	-0.0185506
0.01004	-0.0138481
0.01006	-0.0129076
0.01008	-0.0241935
0.0101	-0.00350276
0.01012	-0.00162178
0.01014	-0.0213721
0.01016	-0.0307769
0.01018	-0.00726471
0.0102	-0.00538373
0.01022	-0.0176101
0.01024	-0.025134
0.01026	-0.00162178
0.01028	-0.0335984
0.0103	-0.0204316
0.01032	-0.0147886
0.01034	-0.0298365
0.01036	-0.0147886
0.01038	-0.0147886
0.0104	0.00119969
0.01042	-0.0223125
0.01044	-0.0147886
0.01046	-0.0298365
0.01048	-0.025134
0.0105	-0.00350276
0.01052	-0.00444325
0.01054	-0.027015
0.01056	-0.0176101
0.01058	-0.00538373
0.0106	-0.0194911
0.01062	-0.00914569
0.01064	-0.0204316
0.01066	-0.00444325
0.01068	-0.025134
0.0107	-0.0110267
0.01072	-0.00632422
0.01074	-0.0223125
0.01076	-0.0119672
0.01078	-0.0204316
0.0108	-0.0110267
0.01082	-0.0110267
0.01084	-0.0204316
0.01086	-0.00914569
0.01088	-0.0138481
0.0109	-0.00726471
0.01092	-0.0138481
0.01094	-0.00726471
0.01096	-0.00632422
0.01098	-0.0241935
0.011	-0.0100862
0.01102	-0.0082052
0.01104	-0.0213721
0.01106	-0.00350276
0.01108	-0.028896
0.0111	0.000259201
0.01112	-0.0110267
0.01114	-0.023253
0.01116	-0.0100862
0.01118	-0.0082052
0.0112	-0.00162178
0.01122	-0.0185506
0.01124	-0.025134
0.01126	-0.0138481
0.01128	0.00214018
0.0113	-0.0157291
0.01132	-0.0176101
0.01134	-0.0194911
0.01136	0.00590214
0.01138	0.00214018
0.0114	-0.0213721
0.01142	-0.0176101
0.01144	-0.0129076
0.01146	-0.0166696
0.01148	-0.0100862
0.0115	-0.0082052
0.01152	0.00590214
0.01154	-0.00162178
0.01156	-0.0279555
0.01158	-0.0138481
0.0116	-0.00444325
0.01162	0.00119969
0.01164	-0.00914569
0.01166	-0.0185506
0.01168	-0.0100862
0.0117	0.00872361
0.01172	-0.00256227
0.01174	-0.0364199
0.01176	-0.0185506
0.01178	-0.0100862
0.0118	-0.0157291
0.01182	-0.0129076
0.01184	-0.0129076
0.01186	-0.00726471
0.01188	-0.00162178
0.0119	-0.0082052
0.01192	-0.00538373
0.01194	-0.0166696
0.01196	0.00402116
0.01198	0.000259201
0.012	-0.0082052
0.01202	-0.0082052
0.01204	-0.0204316
0.01206	-0.00914569
0.01208	-0.0138481
0.0121	-0.00632422
0.01212	-0.0119672
0.01214	-0.0110267
0.01216	-0.0147886
0.01218	-0.027015
0.0122	-0.0260745
0.01222	-0.0194911
0.01224	0.00496165
0.01226	-0.00914569
0.01228	-0.0110267
0.0123	0.00496165
0.01232	0.00402116
0.01234	-0.00162178
0.01236	-0.00632422
0.01238	-0.00538373
0.0124	-0.0176101
0.01242	-0.0185506
0.01244	-0.00726471
0.01246	-0.00350276
0.01248	0.0143665
0.0125	-0.000681288
0.01252	-0.0138481
0.01254	-0.00444325
0.01256	-0.0157291
0.01258	-0.023253
0.0126	-0.0138481
0.01262	0.00778312
0.01264	-0.0185506
0.01266	-0.00162178
0.01268	-0.00256227
0.0127	-0.0129076
0.01272	-0.0194911
0.01274	-0.00444325
0.01276	-0.00538373
0.01278	-0.0204316
0.0128	-0.0204316
0.01282	-0.0166696
0.01284	-0.0110267
0.01286	-0.0185506
0.01288	0.00214018
0.0129	-0.00632422
0.01292	-0.00444325
0.01294	-0.027015
0.01296	0.305918
0.01298	0.776163
0.013	1.11004
0.01302	1.36397
0.01304	1.54078
0.01306	1.63859
0.01308	1.68656
0.0131	1.7176
0.01312	1.69314
0.01314	1.67527
0.01316	1.63671
0.01318	1.57652
0.0132	1.50692
0.01322	1.43263
0.01324	1.37338
0.01326	1.28591
0.01328	1.20691
0.0133	1.11944
0.01332	1.04797
0.01334	0.993417
0.01336	0.928523
0.01338	0.862689
0.0134	0.799676
0.01342	0.717853
0.01344	0.700924
0.01346	0.634149
0.01348	0.604054
0.0135	0.538219
0.01352	0.498719
0.01354	0.456397
0.01356	0.42348
0.01358	0.3868
0.0136	0.343538
0.01362	0.317204
0.01364	0.310621
0.01366	0.274882
0.01368	0.25137
0.0137	0.233501
0.01372	0.215631
0.01374	0.200583
0.01376	0.172369
0.01378	0.162023
0.0138	0.146976
0.01382	0.13569
0.01384	0.123463
0.01386	0.101832
0.01388	0.109356
0.0139	0.0999511
0.01392	0.0839628
0.01394	0.0717364
0.01396	0.0689149
0.01398	0.05951
0.014	0.0689149
0.01402	0.0397598
0.01404	0.0491646
0.01406	0.0369383
0.01408	0.0388193
0.0141	0.0331763
0.01412	0.0247119
0.01414	0.017188
0.01416	0.0228309
0.01418	0.0124856
0.0142	0.0181285
0.01422	0.00214018
0.01424	0.00684263
0.01426	0.00119969
0.01428	0.00496165
0.0143	0.00214018
0.01432	0.00590214
0.01434	0.000259201
0.01436	0.000259201
0.01438	0.000259201
0.0144	-0.00256227
0.01442	0.000259201
0.01444	-0.00162178
0.01446	-0.00162178
0.01448	-0.0138481
0.0145	0.00119969
0.01452	-0.00632422
0.01454	-0.00444325
0.01456	-0.00256227
0.01458	-0.00632422
0.0146	-0.0082052
0.01462	-0.0082052
0.01464	-0.00444325
0.01466	0.000259201
0.01468	-0.0110267
0.0147	-0.00444325
0.01472	-0.0082052
0.01474	-0.000681288
0.01476	-0.00538373
0.01478	-0.00350276
0.0148	-0.0110267
0.01482	0.00119969
0.01484	-0.00632422
0.01486	-0.00162178
0.01488	-0.00914569
0.0149	-0.00914569
0.01492	-0.00162178
0.01494	-0.0119672
0.01496	-0.00914569
0.01498	-0.0119672
0.015	0.00119969
0.01502	-0.00632422
0.01504	-0.00444325
0.01506	-0.0110267
0.01508	-0.00632422
0.0151	-0.00632422
0.01512	-0.0100862
0.01514	-0.0119672
0.01516	-0.0082052
0.01518	-0.00538373
0.0152	-0.00538373
0.01522	-0.00914569
0.01524	-0.00726471
0.01526	-0.000681288
0.01528	-0.00632422
0.0153	-0.00914569
0.01532	-0.0194911
0.01534	-0.0166696
0.01536	-0.0100862
0.01538	-0.0119672
0.0154	-0.0100862
0.01542	-0.0166696
0.01544	-0.0194911
0.01546	-0.0119672
0.01548	-0.0147886
0.0155	-0.0166696
0.01552	-0.0194911
0.01554	-0.0147886
0.01556	-0.0194911
0.01558	-0.0129076
0.0156	-0.0223125
0.01562	-0.0176101
0.01564	-0.0166696
0.01566	-0.0157291
0.01568	-0.0194911
0.0157	-0.025134
0.01572	-0.0345389
0.01574	-0.0223125
0.01576	-0.0317174
0.01578	-0.028896
0.0158	-0.023253
0.01582	-0.0260745
0.01584	-0.027015
0.01586	-0.0241935
0.01588	-0.0307769
0.0159	-0.0279555
0.01592	-0.0241935
0.01594	-0.0260745
0.01596	-0.023253
0.01598	-0.0326579
0.016	-0.0260745
0.01602	-0.027015
0.01604	-0.0298365
0.01606	-0.0204316
0.01608	-0.0298365
0.0161	-0.0204316
0.01612	-0.023253
0.01614	-0.0260745
0.01616	-0.0194911
0.01618	-0.0223125
0.0162	-0.0213721
0.01622	-0.0157291
0.01624	-0.0260745
0.01626	-0.025134
0.01628	-0.0138481
0.0163	-0.0147886
0.01632	-0.0119672
0.01634	-0.0213721
0.01636	-0.0147886
0.01638	-0.0166696
0.0164	-0.0110267
0.01642	-0.0185506
0.01644	-0.0119672
0.01646	-0.0147886
0.01648	-0.0082052
0.0165	-0.0129076
0.01652	-0.0129076
0.01654	-0.0166696
0.01656	-0.0119672
0.01658	-0.00538373
0.0166	-0.0157291
0.01662	-0.0157291
0.01664	-0.0138481
0.01666	-0.0166696
0.01668	-0.0147886
0.0167	-0.0157291
0.01672	-0.0213721
0.01674	-0.00914569
0.01676	-0.0138481
0.01678	-0.0166696
0.0168	-0.0147886
0.01682	-0.0176101
0.01684	-0.0157291
0.01686	-0.0100862
0.01688	-0.0213721
0.0169	-0.0213721
0.01692	-0.0138481
0.01694	-0.0110267
0.01696	-0.0194911
0.01698	-0.0157291
0.017	-0.0129076
0.01702	-0.0129076
0.01704	-0.0147886
0.01706	-0.0147886
0.01708	-0.027015
0.0171	-0.0110267
0.01712	-0.0157291
0.01714	-0.0129076
0.01716	-0.0176101
0.01718	-0.0129076
0.0172	-0.0157291
0.01722	-0.0176101
0.01724	-0.0157291
0.01726	-0.0204316
0.01728	-0.0147886
0.0173	-0.0185506
0.01732	-0.0110267
0.01734	-0.0176101
0.01736	-0.0279555
0.01738	-0.0138481
0.0174	-0.0138481
0.01742	-0.0176101
0.01744	-0.0157291
0.01746	-0.0241935
0.01748	-0.0185506
0.0175	-0.0147886
0.01752	-0.0176101
0.01754	-0.0194911
0.01756	-0.0194911
0.01758	-0.0119672
0.0176	-0.0166696
0.01762	-0.0279555
0.01764	-0.0204316
0.01766	-0.0147886
0.01768	-0.00914569
0.0177	-0.028896
0.01772	-0.0129076
0.01774	-0.0204316
0.01776	-0.0176101
0.01778	-0.0157291
0.0178	-0.0204316
0.01782	-0.027015
0.01784	-0.0166696
0.01786	-0.0157291
0.01788	-0.0204316
0.0179	-0.0260745
0.01792	-0.0110267
0.01794	-0.00726471
0.01796	-0.027015
0.01798	-0.0166696
0.018	-0.025134
0.01802	-0.023253
0.01804	-0.023253
0.01806	-0.0185506
0.01808	-0.0194911
0.0181	-0.025134
0.01812	-0.0176101
0.01814	-0.0129076
0.01816	-0.0260745
0.01818	-0.0166696
0.0182	-0.0213721
0.01822	-0.0147886
0.01824	-0.0223125
0.01826	-0.025134
0.01828	-0.0204316
0.0183	-0.0157291
0.01832	-0.0147886
0.01834	-0.0204316
0.01836	-0.0298365
0.01838	-0.0129076
0.0184	-0.023253
0.01842	-0.0157291
0.01844	-0.0166696
0.01846	-0.0185506
0.01848	-0.0157291
0.0185	-0.0185506
0.01852	-0.0129076
0.01854	-0.0204316
0.01856	-0.0194911
0.01858	-0.0119672
0.0186	-0.0213721
0.01862	-0.0147886
0.01864	-0.0241935
0.01866	-0.0213721
0.01868	-0.0213721
0.0187	-0.0157291
0.01872	-0.0138481
0.01874	-0.0241935
0.01876	-0.0223125
0.01878	-0.0241935
0.0188	-0.0129076
0.01882	-0.0335984
0.01884	-0.0204316
0.01886	-0.0194911
0.01888	-0.0204316
0.0189	-0.0241935
0.01892	-0.0223125
0.01894	-0.0223125
0.01896	-0.0213721
0.01898	-0.0176101
0.019	-0.023253
0.01902	-0.0241935
0.01904	-0.0204316
0.01906	-0.0147886
0.01908	-0.0213721
0.0191	-0.0279555
0.01912	-0.0204316
0.01914	-0.0185506
0.01916	-0.025134
0.01918	-0.027015
0.0192	-0.028896
0.01922	-0.0166696
0.01924	-0.0185506
0.01926	-0.027015
0.01928	-0.0185506
0.0193	-0.023253
0.01932	-0.0129076
0.01934	-0.0119672
0.01936	-0.0204316
0.01938	-0.0176101
0.0194	-0.0119672
0.01942	-0.0166696
0.01944	-0.025134
0.01946	-0.0204316
0.01948	-0.0157291
0.0195	-0.0138481
0.01952	-0.0129076
0.01954	-0.023253
0.01956	-0.027015
0.01958	-0.0129076
0.0196	-0.0157291
0.01962	-0.0138481
0.01964	-0.0204316
0.01966	-0.0166696
0.01968	-0.0279555
0.0197	-0.0223125
0.01972	-0.0138481
0.01974	-0.0147886
0.01976	-0.0157291
0.01978	-0.0213721
0.0198	-0.0194911
0.01982	-0.0157291
0.01984	-0.0185506
0.01986	-0.023253
0.01988	-0.0204316
0.0199	-0.0204316
0.01992	-0.0185506
0.01994	-0.0176101
0.01996	-0.0241935
0.01998	-0.00914569
0.02	-0.00726471
0.02002	-0.0213721
0.02004	-0.0213721
0.02006	-0.0213721
0.02008	-0.0110267
0.0201	-0.0166696
0.02012	-0.0110267
0.02014	-0.0110267
0.02016	-0.00914569
0.02018	-0.0100862
0.0202	-0.023253
0.02022	-0.0279555
0.02024	-0.00350276
0.02026	-0.0204316
0.02028	-0.0176101
0.0203	-0.0326579
0.02032	-0.0138481
0.02034	-0.00632422
0.02036	-0.0129076
0.02038	-0.0194911
0.0204	-0.0260745
0.02042	-0.0100862
0.02044	-0.0279555
0.02046	-0.023253
0.02048	-0.00914569
0.0205	-0.0157291
0.02052	-0.0204316
0.02054	-0.0213721
0.02056	-0.0100862
0.02058	-0.0185506
0.0206	-0.0185506
0.02062	-0.0307769
0.02064	-0.025134
0.02066	-0.0147886
0.02068	-0.0185506
0.0207	-0.0204316
0.02072	-0.0147886
0.02074	-0.0204316
0.02076	-0.023253
0.02078	-0.0223125
0.0208	-0.00538373
0.02082	-0.0194911
0.02084	-0.0176101
0.02086	-0.0213721
0.02088	-0.0176101
0.0209	-0.0213721
0.02092	-0.0260745
0.02094	-0.00538373
0.02096	-0.0166696
0.02098	-0.00632422
0.021	-0.0467653
0.02102	-0.0194911
0.02104	-0.027015
0.02106	-0.0335984
0.02108	-0.00632422
0.0211	-0.0298365
0.02112	-0.0223125
0.02114	-0.025134
0.02116	-0.0260745
0.02118	-0.0298365
0.0212	-0.0100862
0.02122	-0.0383009
0.02124	-0.00350276
0.02126	-0.0166696
0.02128	-0.0364199
0.0213	-0.0364199
0.02132	-0.0129076
0.02134	-0.0194911
0.02136	-0.0345389
0.02138	-0.0241935
0.0214	-0.0213721
0.02142	-0.0204316
0.02144	-0.0185506
0.02146	-0.0335984
0.02148	-0.0213721
0.0215	-0.0241935
0.02152	-0.0241935
0.02154	-0.0157291
0.02156	-0.0298365
0.02158	-0.0213721
0.0216	-0.0157291
0.02162	-0.0157291
0.02164	-0.025134
0.02166	-0.0420628
0.02168	-0.0185506
0.0217	-0.025134
0.02172	-0.0223125
0.02174	-0.0373604
0.02176	-0.0364199
0.02178	-0.0138481
0.0218	-0.00726471
0.02182	-0.027015
0.02184	-0.023253
0.02186	-0.0213721
0.02188	-0.0383009
0.0219	-0.0100862
0.02192	-0.0194911
0.02194	-0.0383009
0.02196	-0.0364199
0.02198	-0.0401818
0.022	-0.0392414
0.02202	-0.0204316
0.02204	-0.0223125
0.02206	-0.023253
0.02208	-0.0354794
0.0221	-0.0298365
0.02212	-0.0119672
0.02214	-0.00914569
0.02216	-0.0223125
0.02218	-0.0185506
0.0222	-0.0307769
0.02222	-0.025134
0.02224	-0.0166696
0.02226	-0.0138481
0.02228	-0.0279555
0.0223	-0.0260745
0.02232	-0.027015
0.02234	-0.0373604
0.02236	-0.0392414
0.02238	-0.00444325
0.0224	-0.00914569
0.02242	-0.023253
0.02244	-0.0298365
0.02246	-0.0260745
0.02248	-0.0401818
0.0225	-0.0448843
0.02252	-0.0260745
0.02254	-0.023253
0.02256	-0.0166696
0.02258	-0.0279555
0.0226	-0.0373604
0.02262	-0.0373604
0.02264	-0.0185506
0.02266	-0.0401818
0.02268	-0.028896
0.0227	-0.0345389
0.02272	-0.0354794
0.02274	-0.0477058
0.02276	-0.0194911
0.02278	-0.025134
0.0228	-0.0213721
0.02282	-0.0147886
0.02284	-0.0260745
0.02286	-0.0335984
0.02288	-0.0364199
0.0229	-0.0383009
0.02292	-0.027015
0.02294	-0.00726471
0.02296	0.299335
0.02298	0.759235
0.023	1.03668
0.02302	1.26334
0.02304	1.44861
0.02306	1.52385
0.02308	1.58687
0.0231	1.60286
0.02312	1.60568
0.02314	1.56241
0.02316	1.53514
0.02318	1.48717
0.0232	1.41382
0.02322	1.33199
0.02324	1.24359
0.02326	1.19374
0.02328	1.13637
0.0233	1.06301
0.02332	0.993417
0.02334	0.917237
0.02336	0.843879
0.02338	0.802497
0.0234	0.760175
0.02342	0.69246
0.02344	0.636971
0.02346	0.586184
0.02348	0.537279
0.0235	0.494957
0.02352	0.44417
0.02354	0.40561
0.02356	0.38586
0.02358	0.363288
0.0236	0.325669
0.02362	0.297454
0.02364	0.277704
0.02366	0.253251
0.02368	0.23256
0.0237	0.200583
0.02372	0.179893
0.02374	0.187417
0.02376	0.146976
0.02378	0.145095
0.0238	0.127225
0.02382	0.112177
0.02384	0.111237
0.02386	0.0933677
0.02388	0.0839628
0.0239	0.0792603
0.02392	0.0698554
0.02394	0.0689149
0.02396	0.0472837
0.02398	0.0510456
0.024	0.0435217
0.02402	0.0378788
0.02404	0.0359978
0.02406	0.02095
0.02408	0.0237714
0.0241	0.0237714
0.02412	0.0200095
0.02414	0.0115451
0.02416	0.0106046
0.02418	0.00778312
0.0242	0.0162475
0.02422	0.00872361
0.02424	0.00778312
0.02426	-0.00444325
0.02428	0.00119969
0.0243	0.00308067
0.02432	-0.00162178
0.02434	-0.00350276
0.02436	-0.0119672
0.02438	0.00402116
0.0244	-0.00726471
0.02442	-0.00444325
0.02444	-0.00914569
0.02446	-0.00162178
0.02448	-0.0082052
0.0245	-0.0147886
0.02452	-0.0147886
0.02454	-0.00914569
0.02456	-0.00632422
0.02458	-0.0157291
0.0246	-0.00632422
0.02462	-0.0138481
0.02464	-0.00632422
0.02466	-0.0100862
0.02468	-0.0138481
0.0247	-0.0138481
0.02472	-0.0157291
0.02474	-0.00538373
0.02476	-0.0157291
0.02478	-0.0082052
0.0248	-0.0185506
0.02482	-0.00632422
0.02484	-0.00914569
0.02486	-0.0147886
0.02488	-0.0176101
0.0249	-0.0147886
0.02492	-0.0147886
0.02494	-0.0119672
0.02496	-0.0185506
0.02498	-0.0185506
0.025	-0.0166696
0.02502	-0.0138481
0.02504	-0.0166696
0.02506	-0.0129076
0.02508	-0.0223125
0.0251	-0.0157291
0.02512	-0.0185506
0.02514	-0.0166696
0.02516	-0.0204316
0.02518	-0.0194911
0.0252	-0.0241935
0.02522	-0.0241935
0.02524	-0.0147886
0.02526	-0.0185506
0.02528	-0.0194911
0.0253	-0.0223125
0.02532	-0.0138481
0.02534	-0.0204316
0.02536	-0.0176101
0.02538	-0.023253
0.0254	-0.0213721
0.02542	-0.0157291
0.02544	-0.0194911
0.02546	-0.0223125
0.02548	-0.0185506
0.0255	-0.0176101
0.02552	-0.0147886
0.02554	-0.0345389
0.02556	-0.0176101
0.02558	-0.0147886
0.0256	-0.0138481
0.02562	-0.0185506
0.02564	-0.0147886
0.02566	-0.0157291
0.02568	-0.00444325
0.0257	-0.0110267
0.02572	-0.0157291
0.02574	-0.0147886
0.02576	-0.00914569
0.02578	-0.0082052
0.0258	-0.0166696
0.02582	-0.0129076
0.02584	-0.00914569
0.02586	-0.00726471
0.02588	-0.0082052
0.0259	-0.0119672
0.02592	-0.0082052
0.02594	-0.00726471
0.02596	-0.0082052
0.02598	-0.0157291
0.026	-0.0110267
0.02602	-0.0119672
0.02604	-0.00350276
0.02606	-0.0147886
0.02608	-0.0147886
0.0261	-0.0260745
0.02612	-0.00914569
0.02614	-0.00726471
0.02616	-0.0138481
0.02618	-0.0176101
0.0262	-0.00914569
0.02622	-0.0129076
0.02624	-0.000681288
0.02626	-0.0317174
0.02628	-0.025134
0.0263	-0.0241935
0.02632	-0.0194911
0.02634	-0.0241935
0.02636	-0.027015
0.02638	-0.0223125
0.0264	-0.0194911
0.02642	-0.0166696
0.02644	-0.023253
0.02646	-0.0194911
0.02648	-0.0204316
0.0265	-0.0166696
0.02652	-0.0204316
0.02654	-0.023253
0.02656	-0.0213721
0.02658	-0.0166696
0.0266	-0.0166696
0.02662	-0.0185506
0.02664	-0.0204316
0.02666	-0.0166696
0.02668	-0.0204316
0.0267	-0.0157291
0.02672	-0.0223125
0.02674	-0.0185506
0.02676	-0.0138481
0.02678	-0.0185506
0.0268	-0.0138481
0.02682	-0.0204316
0.02684	-0.0185506
0.02686	-0.0185506
0.02688	-0.0166696
0.0269	-0.0157291
0.02692	-0.0204316
0.02694	-0.0119672
0.02696	-0.0204316
0.02698	-0.028896
0.027	-0.0166696
0.02702	-0.0223125
0.02704	-0.0157291
0.02706	-0.0185506
0.02708	-0.0223125
0.0271	-0.0223125
0.02712	-0.0241935
0.02714	-0.0129076
0.02716	-0.0176101
0.02718	-0.0204316
0.0272	-0.0176101
0.02722	-0.0204316
0.02724	-0.0119672
0.02726	-0.0185506
0.02728	-0.0176101
0.0273	-0.0129076
0.02732	-0.0129076
0.02734	-0.0176101
0.02736	-0.0194911
0.02738	-0.0185506
0.0274	-0.0185506
0.02742	-0.0119672
0.02744	-0.0176101
0.02746	-0.0213721
0.02748	-0.0185506
0.0275	-0.0176101
0.02752	-0.0157291
0.02754	-0.0157291
0.02756	-0.0147886
0.02758	-0.0110267
0.0276	-0.0279555
0.02762	-0.0194911
0.02764	-0.0213721
0.02766	-0.00538373
0.02768	-0.0185506
0.0277	-0.0317174
0.02772	-0.0204316
0.02774	-0.0223125
0.02776	-0.0204316
0.02778	-0.0204316
0.0278	-0.00726471
0.02782	-0.0147886
0.02784	-0.0260745
0.02786	-0.0260745
0.02788	-0.00632422
0.0279	-0.00256227
0.02792	-0.0100862
0.02794	-0.0119672
0.02796	-0.0213721
0.02798	-0.0082052
0.028	-0.023253
0.02802	-0.0176101
0.02804	-0.0185506
0.02806	-0.0204316
0.02808	-0.0157291
0.0281	-0.00162178
0.02812	-0.0194911
0.02814	-0.0307769
0.02816	-0.00444325
0.02818	-0.0204316
0.0282	-0.028896
0.02822	-0.00632422
0.02824	-0.0176101
0.02826	-0.0176101
0.02828	-0.0100862
0.0283	-0.0213721
0.02832	-0.0119672
0.02834	-0.0176101
0.02836	-0.00632422
0.02838	-0.0176101
0.0284	-0.028896
0.02842	-0.0138481
0.02844	-0.0138481
0.02846	-0.00914569
0.02848	-0.0213721
0.0285	-0.0100862
0.02852	-0.0176101
0.02854	-0.0119672
0.02856	-0.0223125
0.02858	-0.0082052
0.0286	-0.00444325
0.02862	-0.00538373
0.02864	-0.0204316
0.02866	-0.0241935
0.02868	-0.0194911
0.0287	-0.0082052
0.02872	-0.000681288
0.02874	-0.028896
0.02876	-0.0119672
0.02878	-0.00162178
0.0288	-0.00444325
0.02882	-0.025134
0.02884	-0.0204316
0.02886	-0.0213721
0.02888	-0.0213721
0.0289	-0.0166696
0.02892	-0.0110267
0.02894	-0.0213721
0.02896	-0.00350276
0.02898	-0.0194911
0.029	-0.0194911
0.02902	0.00119969
0.02904	-0.0241935
0.02906	-0.0166696
0.02908	-0.0119672
0.0291	-0.023253
0.02912	-0.00632422
0.02914	-0.023253
0.02916	-0.0166696
0.02918	-0.0204316
0.0292	-0.0194911
0.02922	-0.0138481
0.02924	-0.0194911
0.02926	-0.0110267
0.02928	-0.00914569
0.0293	-0.0213721
0.02932	-0.0129076
0.02934	-0.0166696
0.02936	-0.0100862
0.02938	-0.023253
0.0294	-0.0194911
0.02942	-0.0298365
0.02944	-0.00350276
0.02946	-0.0213721
0.02948	-0.0317174
0.0295	-0.00256227
0.02952	-0.0298365
0.02954	-0.00350276
0.02956	-0.0194911
0.02958	-0.0260745
0.0296	-0.0185506
0.02962	-0.0082052
0.02964	-0.0204316
0.02966	-0.0110267
0.02968	-0.027015
0.0297	0.000259201
0.02972	-0.0260745
0.02974	-0.0166696
0.02976	-0.0147886
0.02978	-0.0213721
0.0298	-0.0166696
0.02982	-0.0166696
0.02984	-0.00444325
0.02986	-0.023253
0.02988	-0.00444325
0.0299	-0.0147886
0.02992	-0.027015
0.02994	-0.0194911
0.02996	-0.0147886
0.02998	-0.00538373
0.03	-0.0345389
0.03002	-0.0129076
0.03004	-0.0185506
0.03006	-0.0147886
0.03008	-0.0204316
0.0301	-0.0129076
0.03012	-0.0194911
0.03014	-0.0194911
0.03016	-0.0166696
0.03018	-0.00726471
0.0302	-0.0223125
0.03022	-0.0223125
0.03024	-0.00350276
0.03026	-0.0100862
0.03028	-0.0166696
0.0303	-0.0119672
0.03032	-0.0147886
0.03034	-0.00914569
0.03036	-0.0298365
0.03038	-0.00538373
0.0304	-0.0204316
0.03042	-0.00350276
0.03044	-0.023253
0.03046	-0.0082052
0.03048	-0.0147886
0.0305	-0.028896
0.03052	-0.0100862
0.03054	-0.00350276
0.03056	-0.0185506
0.03058	-0.0194911
0.0306	-0.0166696
0.03062	-0.0100862
0.03064	-0.0176101
0.03066	-0.0223125
0.03068	-0.000681288
0.0307	-0.0157291
0.03072	-0.00914569
0.03074	-0.0194911
0.03076	-0.0119672
0.03078	-0.0129076
0.0308	-0.0119672
0.03082	-0.000681288
0.03084	-0.0110267
0.03086	-0.0082052
0.03088	-0.00444325
0.0309	-0.00726471
0.03092	-0.0213721
0.03094	-0.0185506
0.03096	-0.00350276
0.03098	-0.0185506
0.031	0.0181285
0.03102	-0.0194911
0.03104	-0.0119672
0.03106	0.00308067
0.03108	-0.0307769
0.0311	0.00496165
0.03112	-0.0204316
0.03114	-0.0354794
0.03116	-0.0100862
0.03118	-0.0185506
0.0312	-0.0100862
0.03122	-0.0185506
0.03124	-0.0082052
0.03126	-0.0260745
0.03128	-0.0100862
0.0313	-0.00350276
0.03132	-0.0129076
0.03134	-0.0392414
0.03136	-0.0129076
0.03138	0.0256524
0.0314	-0.0147886
0.03142	-0.0439438
0.03144	0.00402116
0.03146	0.00872361
0.03148	-0.0147886
0.0315	-0.0138481
0.03152	-0.0147886
0.03154	0.000259201
0.03156	-0.0223125
0.03158	-0.0430033
0.0316	-0.0157291
0.03162	0.000259201
0.03164	-0.0194911
0.03166	-0.00350276
0.03168	0.00496165
0.0317	-0.0185506
0.03172	-0.0129076
0.03174	-0.00914569
0.03176	-0.0383009
0.03178	-0.00350276
0.0318	0.00119969
0.03182	-0.0204316
0.03184	-0.0138481
0.03186	-0.027015
0.03188	-0.000681288
0.0319	0.00778312
0.03192	0.0256524
0.03194	-0.00632422
0.03196	-0.0411223
0.03198	-0.0223125
0.032	0.017188
0.03202	0.00966409
0.03204	-0.0176101
0.03206	-0.023253
0.03208	-0.0100862
0.0321	-0.0241935
0.03212	-0.0138481
0.03214	-0.00538373
0.03216	-0.00632422
0.03218	-0.027015
0.0322	-0.00914569
0.03222	-0.027015
0.03224	-0.0157291
0.03226	-0.0157291
0.03228	0.00966409
0.0323	-0.00632422
0.03232	-0.0411223
0.03234	-0.027015
0.03236	0.0106046
0.03238	0.00308067
0.0324	-0.0129076
0.03242	-0.0119672
0.03244	0.00402116
0.03246	-0.00632422
0.03248	-0.0439438
0.0325	0.00496165
0.03252	0.0143665
0.03254	0.0115451
0.03256	-0.0279555
0.03258	0.00214018
0.0326	-0.0326579
0.03262	-0.023253
0.03264	-0.023253
0.03266	0.00496165
0.03268	0.00778312
0.0327	-0.00632422
0.03272	-0.0138481
0.03274	-0.0147886
0.03276	-0.0185506
0.03278	-0.0345389
0.0328	-0.00350276
0.03282	-0.00350276
0.03284	-0.00914569
0.03286	-0.0383009
0.03288	-0.00256227
0.0329	-0.0241935
0.03292	-0.0082052
0.03294	-0.0082052
0.03296	0.336954
0.03298	0.764877
0.033	1.05737
0.03302	1.31036
0.03304	1.49658
0.03306	1.60191
0.03308	1.64518
0.0331	1.66775
0.03312	1.66117
0.03314	1.60474
0.03316	1.57934
0.03318	1.53138
0.0332	1.47213
0.03322	1.39218
0.03324	1.31695
0.03326	1.23888
0.03328	1.17587
0.0333	1.09311
0.03332	1.01035
0.03334	0.945452
0.03336	0.875855
0.03338	0.843879
0.0334	0.785568
0.03342	0.707508
0.03344	0.648257
0.03346	0.612518
0.03348	0.582422
0.0335	0.542922
0.03352	0.470504
0.03354	0.420658
0.03356	0.403729
0.03358	0.359526
0.0336	0.344478
0.03362	0.310621
0.03364	0.295573
0.03366	0.27018
0.03368	0.247608
0.0337	0.225036
0.03372	0.199643
0.03374	0.190238
0.03376	0.173309
0.03378	0.148857
0.0338	0.142273
0.03382	0.13569
0.03384	0.125344
0.03386	0.115939
0.03388	0.0971296
0.0339	0.0858437
0.03392	0.0839628
0.03394	0.0726769
0.03396	0.0642125
0.03398	0.0529266
0.034	0.0576291
0.03402	0.0369383
0.03404	0.0444622
0.03406	0.0359978
0.03408	0.0369383
0.0341	0.0247119
0.03412	0.0265929
0.03414	0.0218905
0.03416	0.0218905
0.03418	0.0134261
0.0342	0.0115451
0.03422	0.0143665
0.03424	0.00590214
0.03426	0.00590214
0.03428	0.00778312
0.0343	0.00590214
0.03432	0.00402116
0.03434	0.00308067
0.03436	-0.00256227
0.03438	-0.00256227
0.0344	0.000259201
0.03442	0.00402116
0.03444	-0.0110267
0.03446	-0.00538373
0.03448	-0.00350276
0.0345	-0.00632422
0.03452	-0.00632422
0.03454	-0.0138481
0.03456	-0.00726471
0.03458	-0.0185506
0.0346	-0.00256227
0.03462	-0.0110267
0.03464	-0.00914569
0.03466	-0.0082052
0.03468	-0.0213721
0.0347	-0.0082052
0.03472	-0.0138481
0.03474	-0.0119672
0.03476	-0.0119672
0.03478	-0.00444325
0.0348	-0.0176101
0.03482	-0.0119672
0.03484	-0.0138481
0.03486	-0.0100862
0.03488	-0.0129076
0.0349	-0.0100862
0.03492	-0.0166696
0.03494	-0.0119672
0.03496	-0.0166696
0.03498	-0.0138481
0.035	-0.0166696
0.03502	-0.0147886
0.03504	-0.0110267
0.03506	-0.0138481
0.03508	-0.0176101
0.0351	-0.0213721
0.03512	-0.0157291
0.03514	-0.0147886
0.03516	-0.00444325
0.03518	-0.0194911
0.0352	-0.0138481
0.03522	-0.0119672
0.03524	-0.0129076
0.03526	-0.0166696
0.03528	-0.0176101
0.0353	-0.00726471
0.03532	-0.0119672
0.03534	-0.0100862
0.03536	-0.0204316
0.03538	-0.0129076
0.0354	-0.0119672
0.03542	-0.0100862
0.03544	-0.0119672
0.03546	-0.0166696
0.03548	-0.0194911
0.0355	-0.0176101
0.03552	-0.0223125
0.03554	-0.025134
0.03556	-0.0185506
0.03558	-0.0157291
0.0356	-0.0185506
0.03562	-0.0298365
0.03564	-0.027015
0.03566	-0.0364199
0.03568	-0.0223125
0.0357	-0.027015
0.03572	-0.025134
0.03574	-0.0298365
0.03576	-0.0420628
0.03578	-0.0241935
0.0358	-0.0298365
0.03582	-0.0298365
0.03584	-0.0317174
0.03586	-0.0354794
0.03588	-0.0298365
0.0359	-0.0279555
0.03592	-0.0354794
0.03594	-0.0317174
0.03596	-0.0354794
0.03598	-0.025134
0.036	-0.028896
0.03602	-0.0335984
0.03604	-0.0279555
0.03606	-0.025134
0.03608	-0.0260745
0.0361	-0.027015
0.03612	-0.0307769
0.03614	-0.023253
0.03616	-0.0194911
0.03618	-0.0213721
0.0362	-0.0241935
0.03622	-0.0307769
0.03624	-0.0448843
0.03626	-0.00632422
0.03628	-0.0213721
0.0363	-0.0157291
0.03632	-0.0119672
0.03634	-0.0119672
0.03636	-0.0138481
0.03638	-0.0176101
0.0364	-0.0213721
0.03642	-0.0166696
0.03644	-0.00726471
0.03646	-0.0185506
0.03648	-0.0119672
0.0365	-0.0157291
0.03652	-0.0147886
0.03654	-0.0100862
0.03656	-0.0157291
0.03658	-0.0176101
0.0366	-0.0138481
0.03662	-0.0138481
0.03664	-0.0129076
0.03666	-0.0213721
0.03668	-0.0129076
0.0367	-0.0110267
0.03672	-0.0147886
0.03674	-0.0260745
0.03676	-0.0194911
0.03678	-0.0194911
0.0368	-0.00538373
0.03682	-0.0194911
0.03684	-0.0279555
0.03686	-0.0194911
0.03688	-0.0129076
0.0369	-0.0138481
0.03692	-0.0194911
0.03694	-0.0317174
0.03696	-0.0138481
0.03698	-0.0129076
0.037	-0.0119672
0.03702	-0.0157291
0.03704	-0.0194911
0.03706	-0.0129076
0.03708	-0.0129076
0.0371	-0.0185506
0.03712	-0.0176101
0.03714	-0.0129076
0.03716	-0.0110267
0.03718	-0.0147886
0.0372	-0.0194911
0.03722	-0.0223125
0.03724	-0.0147886
0.03726	-0.0110267
0.03728	-0.0185506
0.0373	-0.0204316
0.03732	-0.0241935
0.03734	-0.0129076
0.03736	-0.0213721
0.03738	-0.0194911
0.0374	-0.0194911
0.03742	-0.0110267
0.03744	-0.0223125
0.03746	-0.0129076
0.03748	-0.0213721
0.0375	-0.0194911
0.03752	-0.0138481
0.03754	-0.0157291
0.03756	-0.0241935
0.03758	-0.0194911
0.0376	-0.0157291
0.03762	-0.0204316
0.03764	-0.0204316
0.03766	-0.0147886
0.03768	-0.025134
0.0377	-0.0157291
0.03772	-0.0119672
0.03774	-0.025134
0.03776	-0.023253
0.03778	-0.0185506
0.0378	-0.0279555
0.03782	-0.0176101
0.03784	-0.0185506
0.03786	-0.027015
0.03788	-0.0185506
0.0379	-0.0119672
0.03792	-0.0204316
0.03794	-0.0213721
0.03796	-0.0119672
0.03798	-0.0129076
0.038	-0.0204316
0.03802	-0.0185506
0.03804	-0.0119672
0.03806	-0.025134
0.03808	-0.00914569
0.0381	-0.0204316
0.03812	-0.0213721
0.03814	-0.0194911
0.03816	-0.0100862
0.03818	-0.0213721
0.0382	-0.023253
0.03822	-0.0129076
0.03824	-0.0176101
0.03826	-0.0298365
0.03828	-0.0138481
0.0383	-0.0166696
0.03832	-0.025134
0.03834	-0.0147886
0.03836	-0.023253
0.03838	-0.0166696
0.0384	-0.0176101
0.03842	-0.0166696
0.03844	-0.0176101
0.03846	-0.023253
0.03848	-0.0185506
0.0385	-0.0176101
0.03852	-0.0223125
0.03854	-0.00914569
0.03856	-0.0147886
0.03858	-0.0185506
0.0386	-0.0147886
0.03862	-0.0213721
0.03864	-0.0204316
0.03866	-0.0166696
0.03868	-0.0185506
0.0387	-0.0157291
0.03872	-0.0204316
0.03874	-0.0157291
0.03876	-0.0213721
0.03878	-0.0241935
0.0388	-0.023253
0.03882	-0.0129076
0.03884	-0.0138481
0.03886	-0.0157291
0.03888	-0.0326579
0.0389	-0.0298365
0.03892	-0.0082052
0.03894	-0.0185506
0.03896	-0.0279555
0.03898	-0.0194911
0.039	-0.0147886
0.03902	-0.0129076
0.03904	-0.0241935
0.03906	-0.0176101
0.03908	-0.0166696
0.0391	-0.0119672
0.03912	-0.0185506
0.03914	-0.0185506
0.03916	-0.0194911
0.03918	-0.0185506
0.0392	-0.00914569
0.03922	-0.0194911
0.03924	-0.0241935
0.03926	-0.0138481
0.03928	-0.0185506
0.0393	-0.0213721
0.03932	-0.0213721
0.03934	-0.0223125
0.03936	-0.0129076
0.03938	-0.0185506
0.0394	-0.025134
0.03942	-0.0241935
0.03944	-0.0119672
0.03946	-0.0166696
0.03948	-0.0241935
0.0395	-0.0213721
0.03952	-0.0157291
0.03954	-0.0157291
0.03956	-0.0260745
0.03958	-0.0194911
0.0396	-0.0223125
0.03962	-0.0176101
0.03964	-0.0185506
0.03966	-0.0317174
0.03968	-0.0147886
0.0397	-0.0279555
0.03972	-0.0185506
0.03974	-0.0204316
0.03976	-0.0223125
0.03978	-0.0204316
0.0398	-0.0166696
0.03982	-0.0176101
0.03984	-0.0194911
0.03986	-0.0223125
0.03988	-0.0241935
0.0399	-0.0166696
0.03992	-0.0213721
0.03994	-0.0204316
0.03996	-0.0110267
[truncated: 94,503 more rows]
